# Supplementary material for: A quantum-mechanical study of the adsorption of prototype dye molecules on rutile-TiO2(110): a comparison between catechol and isonicotinic acid
Source: Royal Society of Chemistry journal article supplement (doi:10.1039/c2cp42078c), 2012-11-02
Supplement: c2cp42078c.pdf [file c2cp42078c.pdf]

# A quantum-mechanical study of the adsorption of prototype dye molecules on rutile-TiO<sub>2</sub>(110): A comparison between Catechol and Isonicotinic Acid.

F. Risplendi<sup>1</sup>, G. Cicero<sup>1</sup>, G. Mallia<sup>2</sup>, and N. M. Harrison<sup>2,3</sup>

<sup>1</sup>*DISAT Department of Applied Science and Technology,  
Politecnico of Torino, C.so Duca degli Abruzzi 24, 10129, Torino, Italy*

<sup>2</sup>*Thomas Young Centre, Department of Chemistry,  
Imperial College London, South Kensington London SW7 2AZ, UK*

<sup>3</sup>*STFC, Daresbury Laboratory, Daresbury, Warrington, WA4 4AD, UK \**

(Dated: October 12, 2012)

---

\*Electronic address: francesca.risplendi@polito.it

## I. SUPPORTING MATERIALS

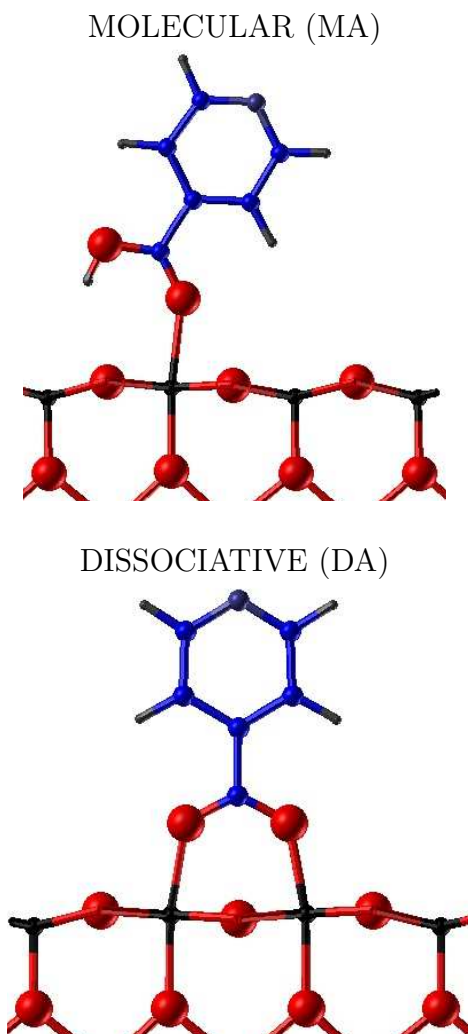

FIG. 1: Ball and stick representation of the adsorption modes of the isonicotinic acid molecule on rutile  $\text{TiO}_2$  (110) surface: Molecular Adsorption mode (MA) and Dissociative Adsorption (BDA). Ti atoms are represented in black, O in red, C in blue, H in grey, and N in dark blue.

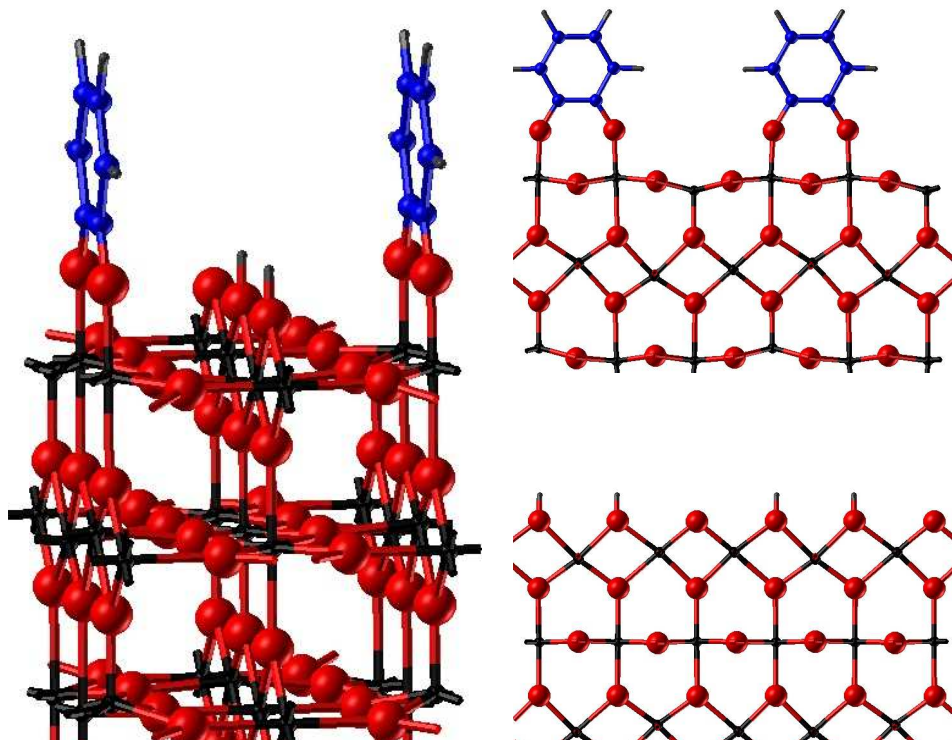

FIG. 2: Bidentate Dissociative Adsorption mode (BDA) for catechol molecule on rutile TiO<sub>2</sub> (110) surface.

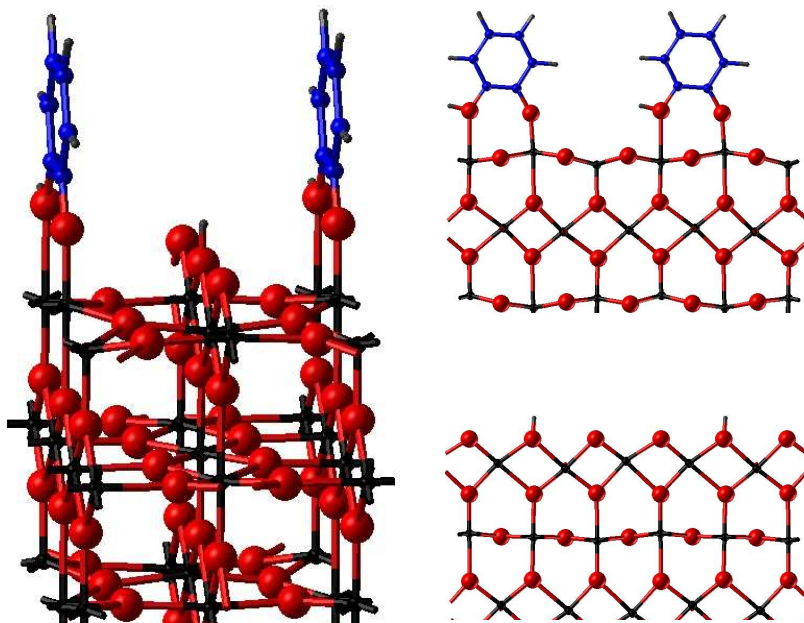

FIG. 3: Monodentate Dissociative Adsorption mode (MDA) for catechol molecule on rutile  $\text{TiO}_2$  (110) surface.

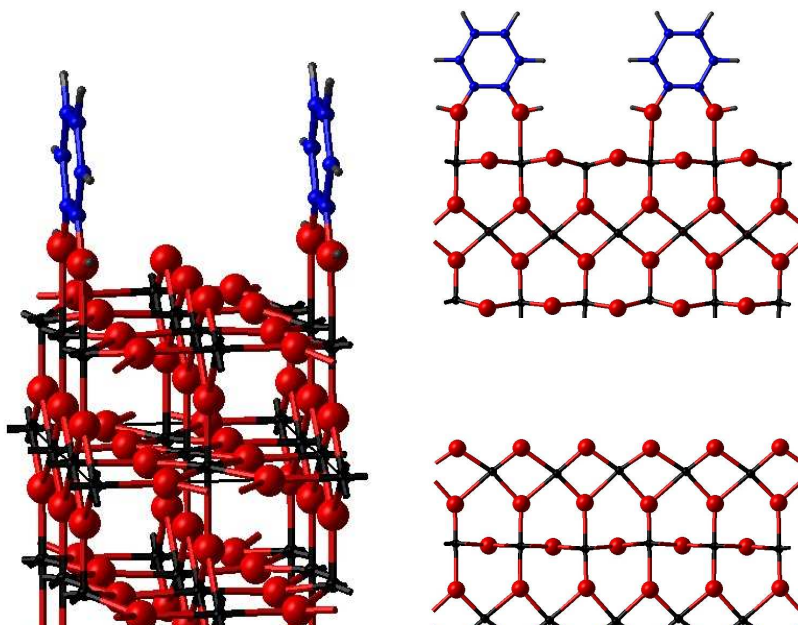

FIG. 4: Molecular Adsorption mode (MA) for catechol molecule on rutile TiO<sub>2</sub> (110) surface.

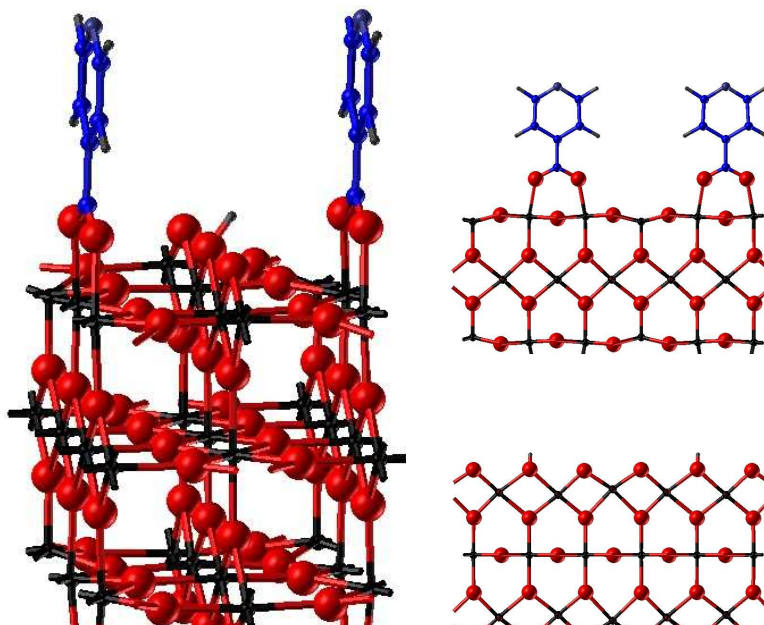

FIG. 5: Dissociative Adsorption mode (DA) for isonicotinic acid molecule on rutile TiO<sub>2</sub> (110) surface.

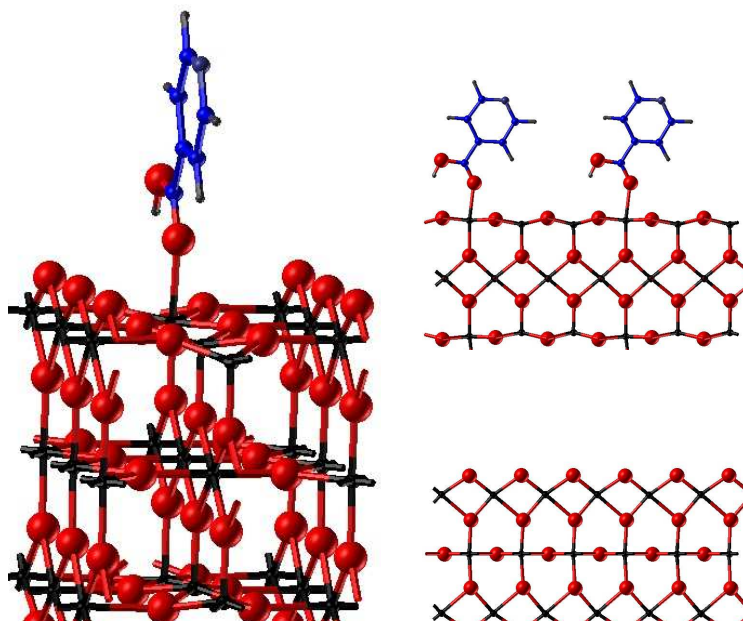

FIG. 6: Molecular Adsorption mode (MA) for isonicotinic acid molecule on rutile TiO<sub>2</sub> (110) surface.
